# Supplementary material for: Reactogenicity Correlates Only Weakly with Humoral Immunogenicity after COVID-19 Vaccination with BNT162b2 mRNA (Comirnaty®)
Source: Vaccines (Basel). 2021 Sep 24;9(10):1063. doi: 10.3390/vaccines9101063 (PMC8539109; doi:10.3390/vaccines9101063)
Supplement: Supplementary file 1 [file vaccines-09-01063-s001.zip › vaccines-1377139-supplementary.pdf]

## Supplementary materials

Figure S1

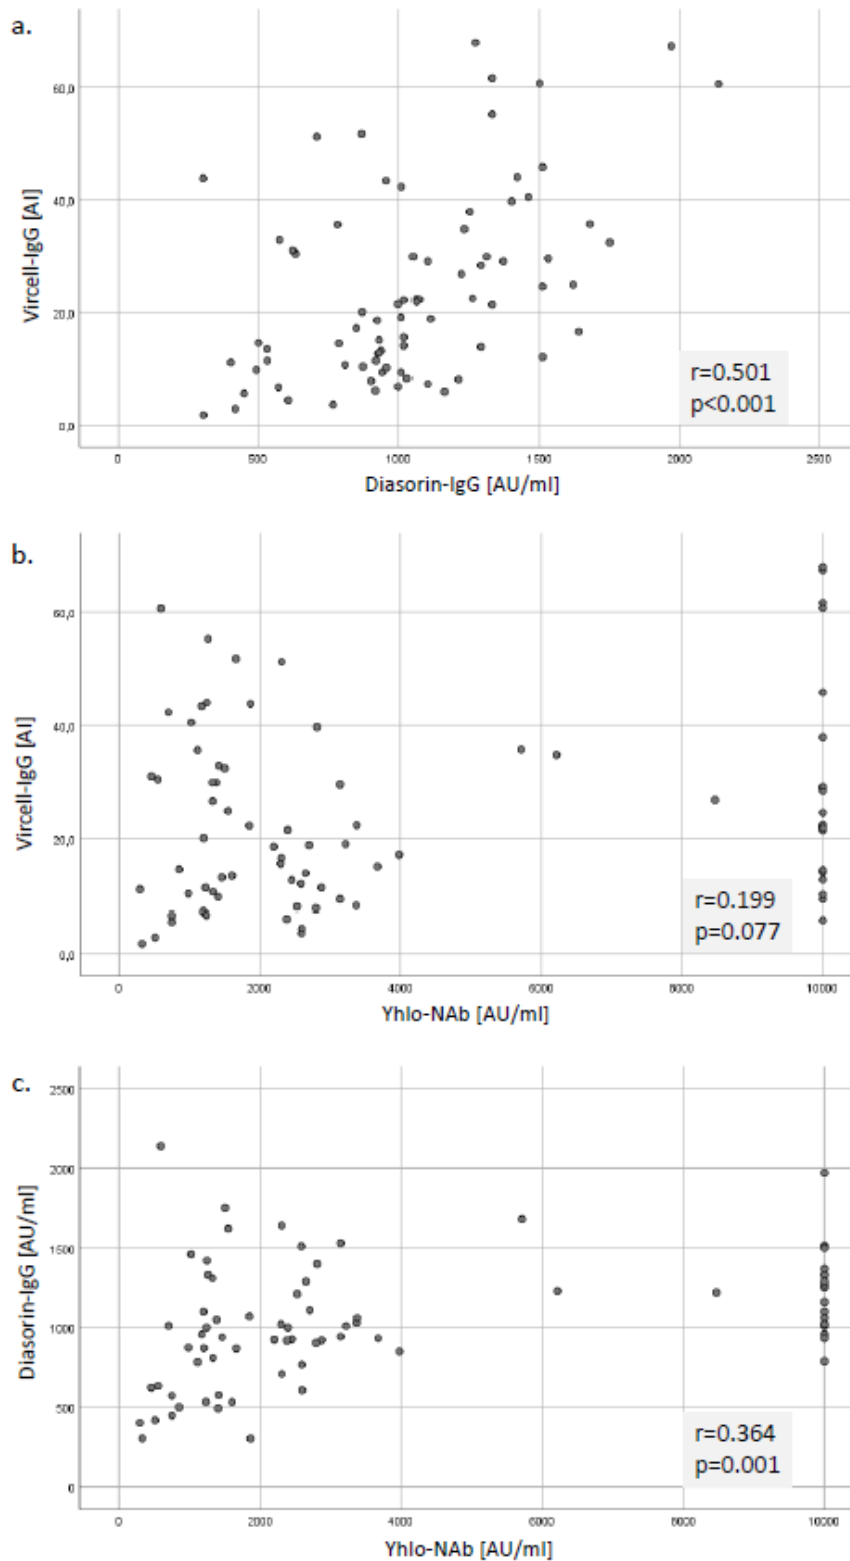

**Figure legend:** Scatter plots of SARS-CoV-2 antibody results measured by three different assays. Pearson's correlation coefficient  $r$  is stated in the grey box.

Held *et al.* Reactogenicity correlates only weakly with humoral immunogenicity after COVID-19 vaccination with BNT162b2 mRNA.

**Table S1a: Comparison of mean antibody levels of woman and men**

|                            | women             | men              | p-value |
|----------------------------|-------------------|------------------|---------|
| Vircell-IgG [AI] (IQR)     | 21.7 (11.4-35.6)  | 15.1 (9.2-28.0)  | 0.229   |
| Diasorin-IgG [AU/ml] (IQR) | 1025 (871-1310)   | 949 (778-1250)   | 0.378   |
| Yhlo-Nab [AU/ml] (IQR)     | 2517 (1324-10000) | 2196 (1250-3824) | 0.473   |

**Table legend:** Median SARS-CoV-2 antibody levels of woman and men and comparison of means with the Mann-Whitney-U-test. AI, antibody index; AU, arbitrary units; IQR, interquartile range.

**Table S1b: Median AUCs of adverse effects stratified after gender**

|                                |       | median AUC after<br>prime dose (IQR) | p-value | median AUC after<br>boost dose (IQR) | p-value |
|--------------------------------|-------|--------------------------------------|---------|--------------------------------------|---------|
| inability to work [d]          | women | 0 (0-0)                              | 0.701   | 0 (0-1)                              | 0.163   |
|                                | men   | 0 (0-0)                              |         | 0 (0-0)                              |         |
| local injection site reactions |       |                                      |         |                                      |         |
| pain                           | women | 2 (0-8.5)                            | 0.444   | 3 (0-11)                             | 0.768   |
|                                | men   | 4 (0-6.0)                            |         | 4 (2-9)                              |         |
| swelling                       | women | 0 (0-0)                              | 0.213   | 0 (0-0)                              | 0.323   |
|                                | men   | 0 (0-0)                              |         | 0 (0-0)                              |         |
| redness                        | women | 0 (0-0)                              | 0.656   | 0 (0-0)                              | 0.433   |
|                                | men   | 0 (0-0)                              |         | 0 (0-0)                              |         |
| local lymphadenopathy          | women | ---                                  | ---     | 0 (0-0)                              | 0.531   |
|                                | men   | ---                                  | ---     | 0 (0-0)                              |         |
| systemic reactions             |       |                                      |         |                                      |         |
| chills                         | women | ---                                  | ---     | 0 (0-0)                              | 0.240   |
|                                | men   | ---                                  | ---     | 0 (0-0)                              |         |
| malaise                        | women | 0 (0-0)                              | 0.148   | 0 (0-4)                              | 0.888   |
|                                | men   | 0 (0-0)                              |         | 0 (0-0)                              |         |
| nausea                         | women | ---                                  | ---     | 0 (0-0)                              | 0.433   |
|                                | men   | ---                                  | ---     | 0 (0-0)                              |         |
| fatigue                        | women | 0 (0-0)                              | 0.709   | 5 (0-14)                             | 0.053   |
|                                | men   | 0 (0-0)                              |         | 0 (0-5)                              |         |
| headache                       | women | 0 (0-0)                              | 0.421   | 0 (0-5.5)                            | 0.731   |
|                                | men   | 0 (0-0)                              |         | 0 (0-3)                              |         |
| pain in the limbs              | women | ---                                  | ---     | 0 (0-4)                              | 0.317   |
|                                | men   | ---                                  | ---     | 0 (0-0)                              |         |
| joint pain                     | women | ---                                  | ---     | 0 (0-0)                              | 0.647   |
|                                | men   | ---                                  | ---     | 0 (0-0)                              |         |
| muscle pain                    | women | ---                                  | ---     | 0 (0-0)                              | 0.636   |
|                                | men   | ---                                  | ---     | 0 (0-0)                              |         |
| elevated temperature           | women | ---                                  | ---     | 0 (0-0)                              | 0.228   |
|                                | men   | ---                                  | ---     | 0 (0-0)                              |         |

**Table legend:** Median area under the adverse effect curve (AUC) for each adverse effect after prime and boost vaccination stratified after gender. Adverse effects (AEs) that occurred in less than five subjects were excluded from the analysis. IQR, interquartile range.

Held *et al.* Reactogenicity correlates only weakly with humoral immunogenicity after COVID-19 vaccination with BNT162b2 mRNA.

**Table S1c: Correlation of antibody levels with age and body mass index**

|              |     | Pearson's correlation coefficient r | p-value |
|--------------|-----|-------------------------------------|---------|
| Vircell-IgG  | age | 0.062                               | 0.584   |
|              | BMI | 0.081                               | 0.480   |
| Diasorin-IgG | age | -0.153                              | 0.182   |
|              | BMI | 0.077                               | 0.510   |
| Yhlo-Nab     | age | -0.066                              | 0.562   |
|              | BMI | 0.162                               | 0.156   |

**Table S1d: Correlation of adverse effects with age and body mass index**

|                                |     | Pearson's correlation coefficient r after prime dose | p-value | Pearson's correlation coefficient r after boost dose | p-value |
|--------------------------------|-----|------------------------------------------------------|---------|------------------------------------------------------|---------|
| inability to work [d]          | age | -0.053                                               | 0.643   | -0.052                                               | 0.645   |
|                                | BMI | -0.014                                               | 0.904   | -0.072                                               | 0.529   |
| local injection site reactions |     |                                                      |         |                                                      |         |
| pain                           | age | -0.003                                               | 0.978   | 0.000                                                | 0.996   |
|                                | BMI | -0.016                                               | 0.889   | -0.051                                               | 0.660   |
| swelling                       | age | 0.040                                                | 0.724   | 0.009                                                | 0.938   |
|                                | BMI | 0.084                                                | 0.464   | 0.190                                                | 0.095   |
| redness                        | age | 0.032                                                | 0.778   | 0.054                                                | 0.637   |
|                                | BMI | 0.102                                                | 0.374   | 0.132                                                | 0.251   |
| local lymphadenopathy          | age | ---                                                  | ---     | -0.160                                               | 0.155   |
|                                | BMI | ---                                                  | ---     | -0.041                                               | 0.719   |
| systemic reactions             |     |                                                      |         |                                                      |         |
| chills                         | age | ---                                                  | ---     | 0.066                                                | 0.559   |
|                                | BMI | ---                                                  | ---     | -0.061                                               | 0.596   |
| malaise                        | age | -0.058                                               | 0.612   | 0.023                                                | 0.841   |
|                                | BMI | 0.101                                                | 0.381   | -0.089                                               | 0.439   |
| nausea                         | age | ---                                                  | ---     | 0.102                                                | 0.367   |
|                                | BMI | ---                                                  | ---     | -0.008                                               | 0.943   |
| fatigue                        | age | -0.144                                               | 0.203   | 0.083                                                | 0.466   |
|                                | BMI | 0.037                                                | 0.750   | -0.070                                               | 0.543   |
| headache                       | age | -0.040                                               | 0.722   | -0.006                                               | 0.956   |
|                                | BMI | 0.182                                                | 0.110   | 0.005                                                | 0.966   |
| pain in the limbs              | age | ---                                                  | ---     | 0.031                                                | 0.783   |
|                                | BMI | ---                                                  | ---     | -0.008                                               | 0.945   |
| joint pain                     | age | ---                                                  | ---     | 0.075                                                | 0.508   |
|                                | BMI | ---                                                  | ---     | -0.066                                               | 0.565   |
| muscle pain                    | age | ---                                                  | ---     | 0.235                                                | 0.036   |
|                                | BMI | ---                                                  | ---     | -0.066                                               | 0.567   |
| elevated temperature           | age | ---                                                  | ---     | 0.006                                                | 0.954   |
|                                | BMI | ---                                                  | ---     | -0.193                                               | 0.090   |

**Table legend:** Adverse effects (AEs) that occurred in less than five subjects were excluded from the analysis. Significant correlations are marked in orange. BMI, body mass index; r, Pearson's correlation coefficient.

Held *et al.* Reactogenicity correlates only weakly with humoral immunogenicity after COVID-19 vaccination with BNT162b2 mRNA.

**Table S2a: Median AUCs stratified after taking anti-inflammatory medication**

|                                                                                     | anti-inflammatory med. after prime dose |           | p-value | anti-inflammatory med. after boost dose |           | p-value |
|-------------------------------------------------------------------------------------|-----------------------------------------|-----------|---------|-----------------------------------------|-----------|---------|
|                                                                                     | yes (n=2)                               | no (n=78) |         | yes (n=22)                              | no (n=58) |         |
| inability to work [d]                                                               | ---                                     | 0         | ---     | 1                                       | 0         | <0.001  |
| <b>local injection site reaction after prime and boost dose, respectively [AUC]</b> |                                         |           |         |                                         |           |         |
| pain                                                                                | 25.5                                    | 2         | 0.016   | 12                                      | 2         | <0.001  |
| swelling                                                                            | 6                                       | 0         | 0.306   | 0                                       | 0         | 0.145   |
| redness                                                                             | 6                                       | 0         | 0.292   | 0                                       | 0         | 0.258   |
| local lymphadenopathy [AUC]                                                         | ---                                     | ---       | ---     | 0                                       | 0         | 0.202   |
| <b>systemic reactions [AUC]</b>                                                     |                                         |           |         |                                         |           |         |
| chills                                                                              | ---                                     | ---       | ---     | 2                                       | 0         | <0.001  |
| malaise                                                                             | 10                                      | 0         | 0.306   | 4                                       | 0         | <0.001  |
| nausea                                                                              | ---                                     | ---       | ---     | 0                                       | 0         | 0.207   |
| fatigue                                                                             | 25                                      | 0         | 0.006   | 10                                      | 0         | <0.001  |
| headache                                                                            | 16                                      | 0         | 0.320   | 7                                       | 0         | <0.001  |
| pain in the limbs                                                                   | ---                                     | ---       | ---     | 2                                       | 0         | 0.003   |
| joint pain                                                                          | ---                                     | ---       | ---     | 0                                       | 0         | 0.090   |
| muscle pain                                                                         | ---                                     | ---       | ---     | 0                                       | 0         | 0.070   |
| elevated temperature                                                                | ---                                     | ---       | ---     | 0                                       | 0         | <0.001  |

**Table legend:** Median area under the adverse effect curve (AUC) for each adverse effect after prime and boost vaccination stratified after use of anti-inflammatory medication. Adverse effects (AEs) that occurred in less than five subjects were excluded from the analysis. Significant correlations are marked in orange.

**Table S2b: Median SARS-CoV-2 antibody levels stratified after taking anti-inflammatory medication**

|                            | anti-inflammatory med. after prime dose |                  | p-value | anti-inflammatory med. after boost dose |                   | p-value |
|----------------------------|-----------------------------------------|------------------|---------|-----------------------------------------|-------------------|---------|
|                            | yes (n=2)                               | no (n=78)        |         | yes (n=22)                              | no (n=58)         |         |
| Vircell-IgG [AI] (IQR)     | 49.2 (31.0-67.3)                        | 19.6 (10.9-32.7) | 0.084   | 20. (14.6-31.0)                         | 21.4 (10.2-34.8)  | 0.314   |
| Diasorin-IgG [AU/ml] (IQR) | 1297 (623-1970)                         | 1016 (860-1290)  | 0.747   | 1020 (869-1330)                         | 1011 (810-1270)   | 0.757   |
| Yhlo-NAb [AU/ml] (IQR)     | 5229 (458-10000)                        | 2489 (1293-9234) | 0.820   | 2526 (1414-3976)                        | 2395 (1237-10000) | 0.583   |

**Table legend:** Median SARS-CoV-2 antibody levels stratified after taking anti-inflammatory medication and comparison of means with the Mann-Whitney-U-test. AI, antibody index; AU, arbitrary units; IQR, interquartile range.
